# Supplementary material for: The Opposing Roles of IVS2+691 CC Genotype and AC/AG Diplotype of 118A>G and IVS2+691G>C of OPRM1 Polymorphisms in Cold Pain Tolerance Among Opioid-Dependent Malay Males on Methadone Therapy
Source: Springer Nature journal article supplement (doi:10.1007/s40122-015-0041-y), 2015-11-18
Supplement: MOESM1 [file 9339896]

## SUPPLEMENTARY MATERIAL

**Table S1. *OPRM1* primers used for allele-specific multiplex PCR of *OPRM1* 118A>G (dbSNP rs1799971) and IVS2+691G>C (dbSNP rs2075572).**

| PCR                 | Primer     | Sequence (5' – 3')             | Fragment size (bp) | [Primer] (μM) |
|---------------------|------------|--------------------------------|--------------------|---------------|
| First PCR Set A     | μ EX1 FW   | aaa gtc tcg gtg ctc ctg gct    | 420                | 0.10          |
|                     | μ EX1 RV   | tgg gag tta ggt gtc tct ttg ta |                    | 0.10          |
|                     | μ INT2 FW  | tag att tcc gta ctc ccc gaa    | 1020               | 0.20          |
|                     | μ INT2 RV  | cgc aag atc atc agt cca tag    |                    | 0.20          |
| Second PCR Set 1    |            |                                |                    |               |
| Common primer       | μ EX1 RV   | tgg gag tta ggt gtc tct ttg ta |                    | 0.25          |
| Wild-type primers   | μ 118 A FW | caa ctt gtc cca ctt aga tgg ca | 267                | 0.25          |
| Mutant-type primers | μ 118 G FW | caa ctt gtc cca ctt aga tgg cg |                    | 0.25          |
| Second PCR Set 2    |            |                                |                    |               |
| Common primer       | μ INT2 RV  | cgc aag atc atc agt cca tag    |                    | 0.15          |
| Wild-type primers   | μ 691G FW  | gct ctg gtc aag gct aaa aat g  | 240                | 0.15          |
| Mutant-type primers | μ 691C FW  | gct ctg gtc aag gct aaa aat c  |                    | 0.15          |

**Table S2. Genotype and allele distributions for 118A>G and IVS2+691G>C polymorphisms among opioid-dependent participants.**

| Polymorphism          | Genotype/<br>allele | N   | Frequency<br>(%) | 95% CI         |                | HWE<br>P value<br>* |
|-----------------------|---------------------|-----|------------------|----------------|----------------|---------------------|
|                       |                     |     |                  | Lower<br>limit | Upper<br>limit |                     |
| <b>118A&gt;G</b>      |                     |     |                  |                |                |                     |
| Genotype (N = 148)    | AA                  | 53  | 35.8             | 28.1           | 43.5           | 1.000               |
|                       | AG                  | 71  | 48.0             | 40.0           | 56.0           |                     |
|                       | GG                  | 24  | 16.2             | 10.3           | 22.1           |                     |
| Allele (N = 296)      | A                   | 177 | 59.8             | 54.2           | 65.4           |                     |
|                       | G                   | 119 | 40.2             | 34.6           | 45.8           |                     |
| Dominant model        | AA                  | 53  | 35.8             | 28.1           | 43.5           |                     |
|                       | AG + GG             | 95  | 64.2             | 56.5           | 71.9           |                     |
| Recessive model       | AA + AG             | 124 | 83.8             | 77.9           | 89.7           |                     |
|                       | GG                  | 24  | 16.2             | 10.3           | 22.1           |                     |
| <b>IVS2+691G&gt;C</b> |                     |     |                  |                |                |                     |
| Genotype (N = 148)    | GG                  | 1   | 0.7              | 0.0            | 2.0            | 0.078               |
|                       | GC                  | 48  | 32.4             | 24.9           | 39.9           |                     |
|                       | CC                  | 99  | 66.9             | 59.3           | 74.5           |                     |
| Allele (N = 296)      | G                   | 50  | 16.9             | 12.6           | 21.2           |                     |
|                       | C                   | 246 | 83.1             | 78.8           | 87.4           |                     |
| Dominant model        | GG                  | 1   | 0.7              | 0.0            | 2.0            |                     |
|                       | GC + CC             | 147 | 99.3             | 98.0           | 100.0          |                     |
| Recessive model       | GG + GC             | 49  | 33.1             | 25.5           | 40.7           |                     |
|                       | CC                  | 99  | 66.9             | 59.3           | 74.5           |                     |

\*Fisher's exact test evaluates the probability of genotype counts that are equally or less likely than the observed counts under HWE for biallelic locus

N, number of subject/allele; CI, confidence interval; HWE, Hardy-Weinberg equilibrium

**Table S3. Haplotype and diplotype distributions for 118A>G and IVS2+691G>C polymorphisms among opioid-dependent patients.**

| Haplotype/diplotype              | <i>N</i> | Frequency (%) | 95% CI      |             |  |
|----------------------------------|----------|---------------|-------------|-------------|--|
|                                  |          |               | Lower limit | Upper limit |  |
| Haplotype <sup>a</sup> (N = 296) |          |               |             |             |  |
| 1. AC                            | 132      | 44.6          | 38.9        | 50.3        |  |
| 2. GC                            | 114      | 38.5          | 33.0        | 44.0        |  |
| 3. AG                            | 45       | 15.2          | 11.1        | 19.3        |  |
| 4. GG                            | 5        | 1.7           | 0.2         | 3.2         |  |
| Diplotype (N = 148)              |          |               |             |             |  |
| 1. AC/GC                         | 48       | 32.4          | 24.9        | 39.9        |  |
| 2. AC/AC                         | 31       | 20.9          | 14.3        | 27.5        |  |
| 3. AC/AG                         | 22       | 14.9          | 9.2         | 20.6        |  |
| 4. GC/AG                         | 22       | 14.9          | 9.2         | 20.6        |  |
| 5. GC/GC                         | 20       | 13.5          | 8.0         | 19.0        |  |
| 6. GC/GG                         | 4        | 2.7           | 0.1         | 5.3         |  |
| 7. AG/GG                         | 1        | 0.7           | 0.0         | 2.0         |  |

<sup>a</sup>Haplotype patterns were constructed from the two polymorphisms of *OPRM1* (118A>G and IVS2+691G>C)

N, number of haplotype/diplotype; CI, confidence interval
