# Supplementary material for: The Opposing Roles of IVS2+691 CC Genotype and AC/AG Diplotype of 118A>G and IVS2+691G>C of OPRM1 Polymorphisms in Cold Pain Tolerance Among Opioid-Dependent Malay Males on Methadone Therapy
Source: Springer Nature journal article supplement (doi:10.1007/s40122-015-0041-y), 2015-11-18
Supplement: MOESM2 [file 9339896]

- The role of *OPRM1* polymorphisms on cold pain sensitivity among opioid-dependent patients on methadone is unclear but may be ethnic dependent.
- Malay participants with IVS2+691 CC genotype express higher sensitivity to cold pressor pain tolerance than those without CC genotype (i.e., GG/GC genotype).
- On the other hand, Malay participants with AC/AG diplotype for 118A>G and IVS2+691G>C polymorphisms express lower sensitivity to cold pressor pain tolerance.
- *OPRM1* polymorphisms may explain inter-individual variability in pain sensitivity among opioid-dependent patients on methadone maintenance therapy.

This summary slide represents the opinions of the authors. The study was supported by the Universiti Sains Malaysia (USM) grant under the 'Research University Cluster (RUC)' Grant No.1001.PSK.8620014, under the project; Application of Personalised Methadone Therapy Methadone Maintenance Therapy (PMT for MMT). For a full list of acknowledgments and disclosures for all authors of this article, please see the full text online.

© The Author(s) 2015. Creative Commons Attribution Noncommercial License (CC BY-NC).
